# Supplementary material
Source: Springer Nature journal article supplement (https://www.springermedizin.de/resource/supplementary/13063_2014_2328_MOESM6_ESM.pdf/9621924)

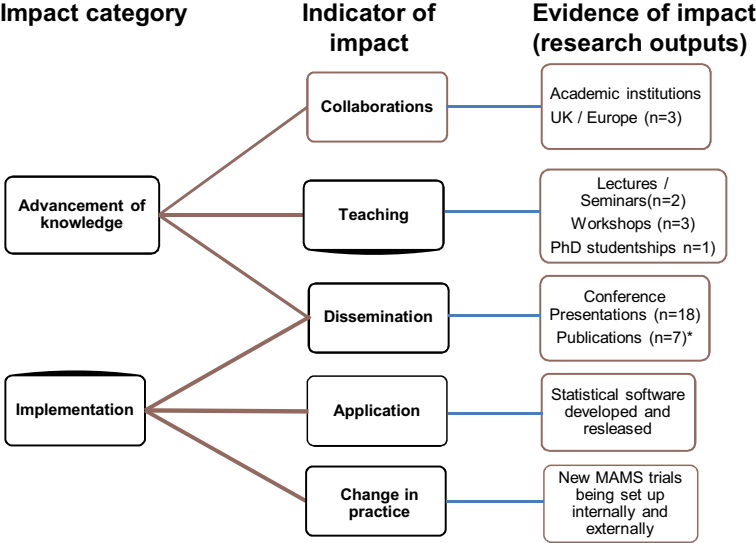

Supplement: MOESM6 [file 9621924]
